# Supplementary material for: Interaction of Interleukin-17A with a Th2 Response in a Mouse Model of Allergic Airway Inflammation
Source: MDPI journal article supplement (doi:10.3390/cells12131774), 2023-07-04
Supplement: s1 [file s1]

## **Supplemental Material**

# **Interaction of Interleukin-17A with a Th2 Response in a Mouse Model of Allergic Airway Inflammation**

**Karin Peters <sup>1</sup>, Stefanie Ernst <sup>2</sup> and Marcus Peters <sup>1,\*</sup>**

<sup>1</sup> Department of Molecular Immunology, Ruhr-University Bochum, D-44780 Bochum, Germany

<sup>2</sup> Department of Experimental Pneumology, Ruhr-University Bochum, D-44780 Bochum, Germany

\* Correspondence: [marcus.peters@rub.de](mailto:marcus.peters@rub.de)

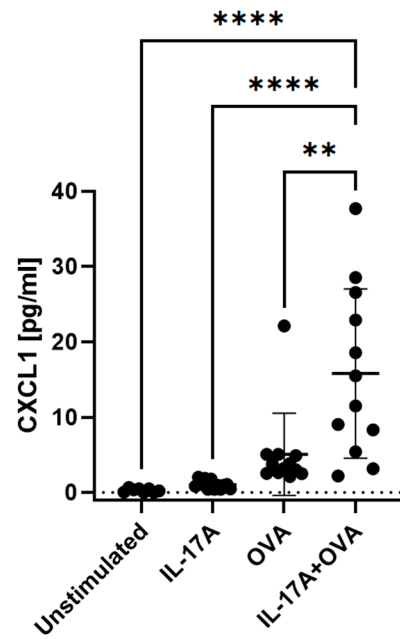

**A**

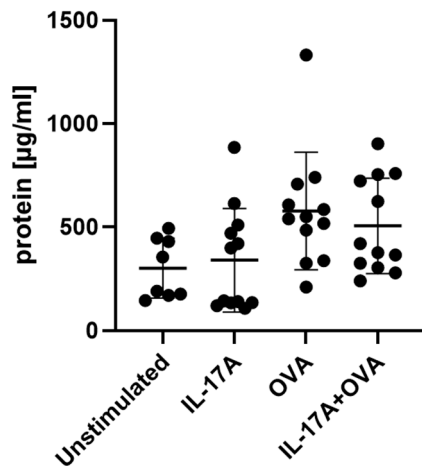

**B**

Supplemental Figure S1 : **Measurement of CXCL1 and total protein in BALF.** A) CXCL1 was measured in BALF supernatant by ELISA. B) total protein in BALF supernatant was measured by a Bradford assay and quantified by preparing a standard curve with bovine serum albumin. Statistical significance is determined by comparing the OVA with OVA+IL17A group by one way ANOVA test \*\*  $p < 0,01$ , \*\*\*\*  $p < 0,0001$ .

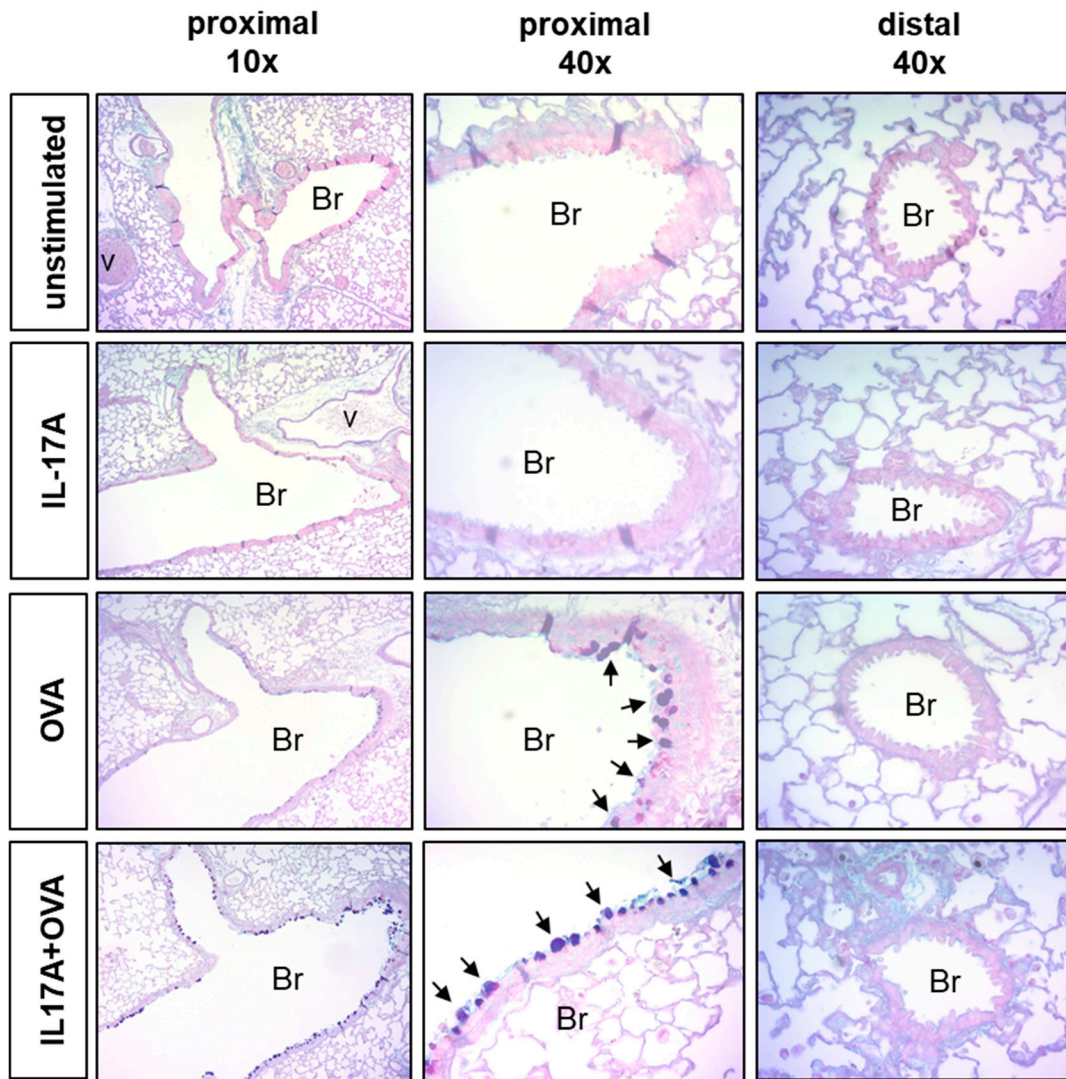

Supplemental Figure S2: **Alcianblue-PAS staining of goblet cells.** Representative Alcianblue-PAS staining of paraffin sections of the lung tissue of mice from the different groups. Proximal and distal bronchioles are shown at different magnification (Br=bronchiole, v=vessel, arrows indicate goblet cells)

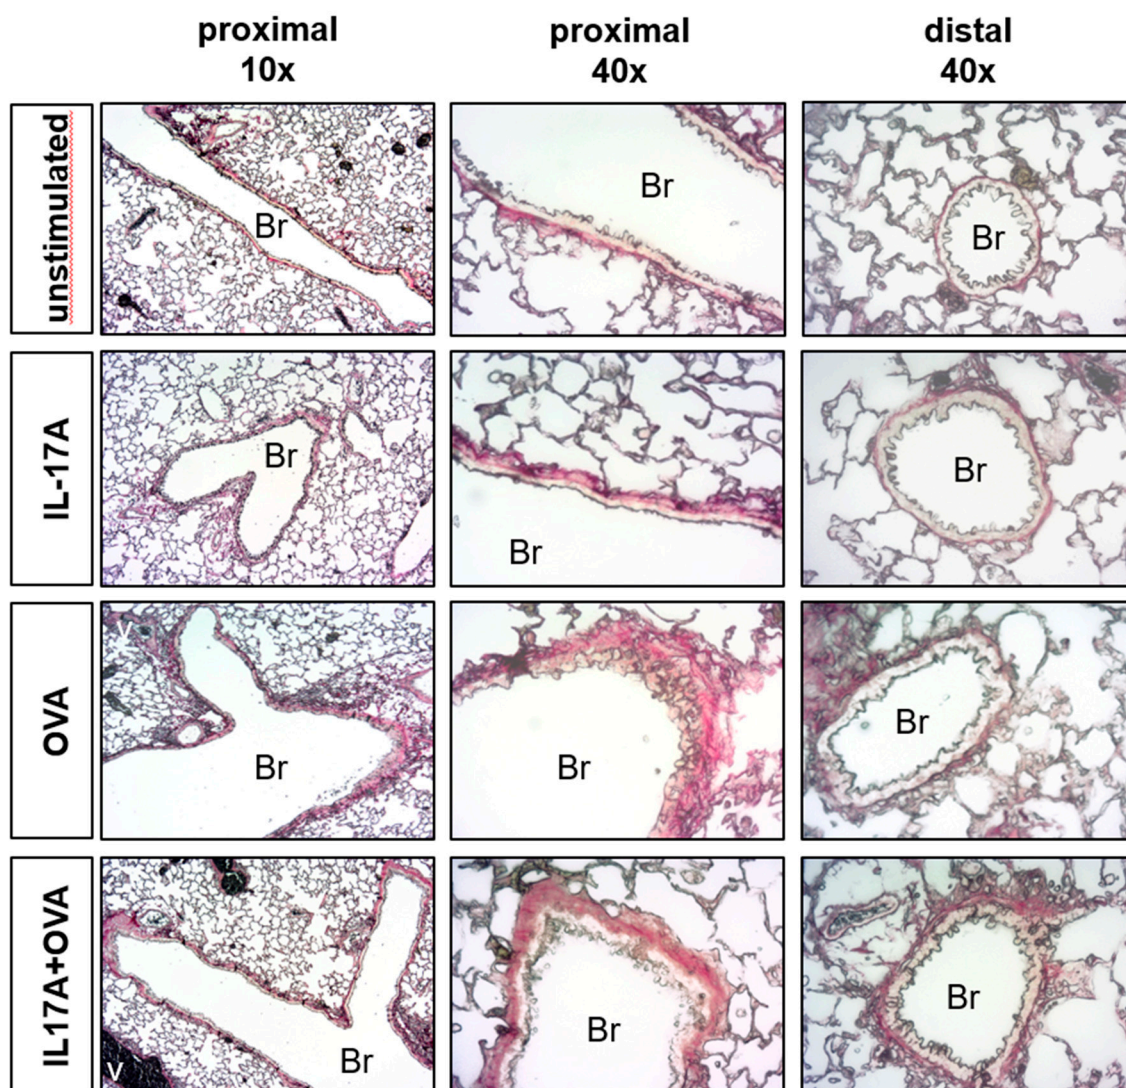

Supplemental Figure S3: **Sirius red staining of bronchiolar collagen layer.** Representative Sirius red staining of paraffin sections of the lung tissue of mice from the different groups. Proximal and distal bronchioles are shown at different magnification (Br=bronchiole, v=vessel)



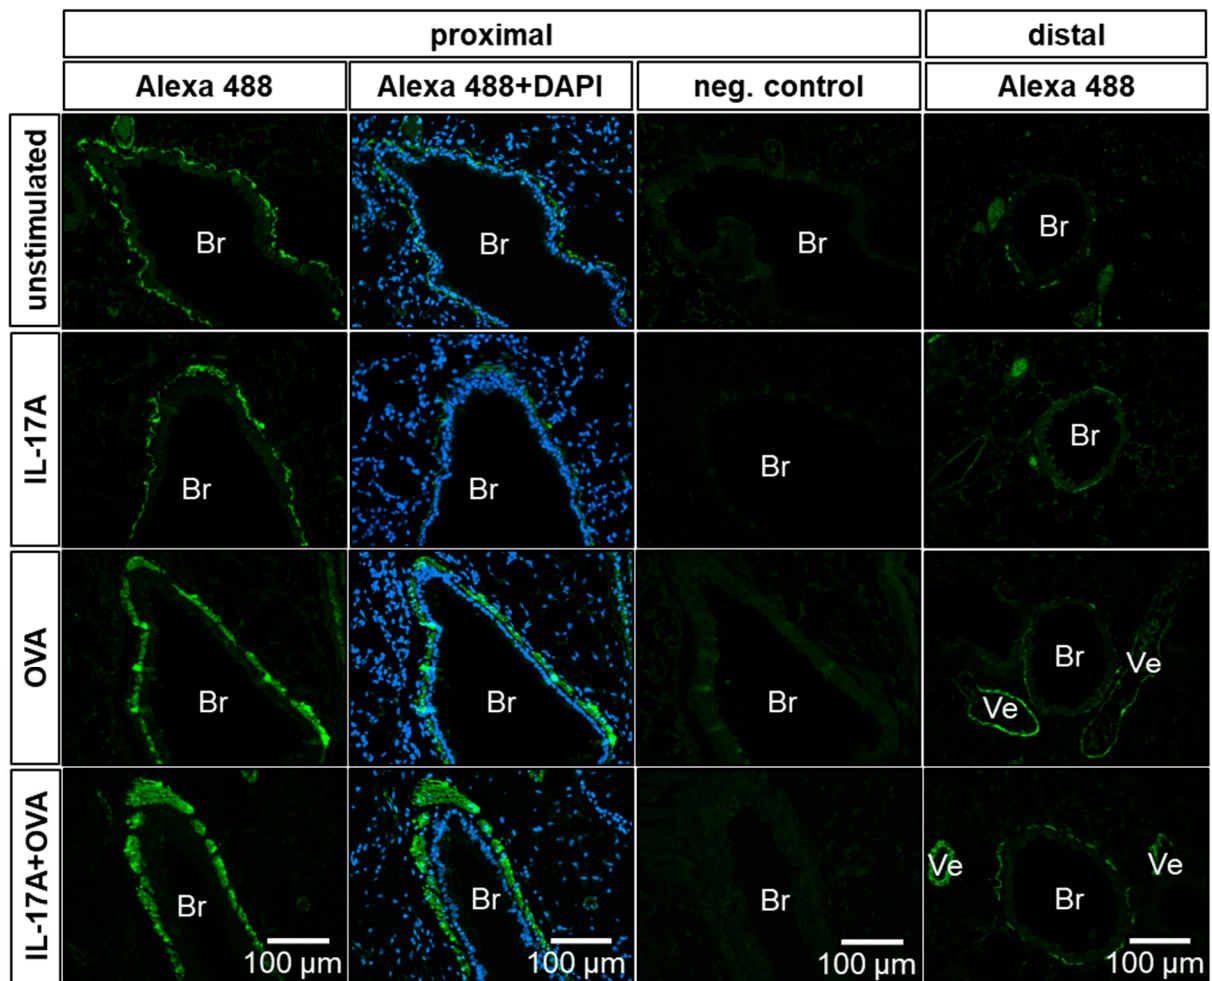

Supplemental Figure S4: **detection of  $\alpha$ -smooth muscle actin ( $\alpha$ SMA) by immunohistochemistry.** Representative  $\alpha$ SMA staining of paraffin sections of the lung tissue of mice from the different groups. Indirect immunofluorescence staining was performed by using a primary antibody directed against  $\alpha$ SMA, followed by an AlexaFluor488 coupled second antibody. In the negative control the primary antibody was omitted. Proximal and distal bronchioles are shown (Br=bronchiole, ve=vessel)

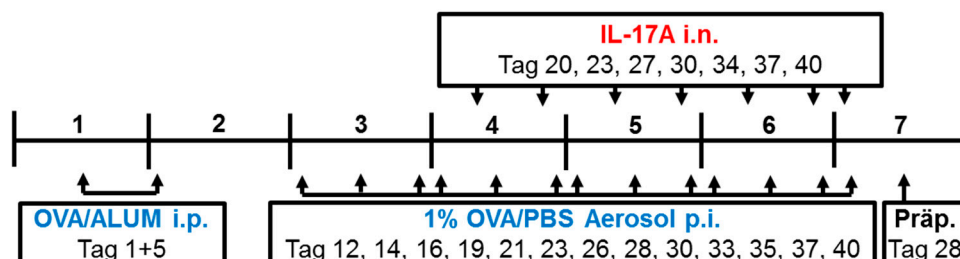

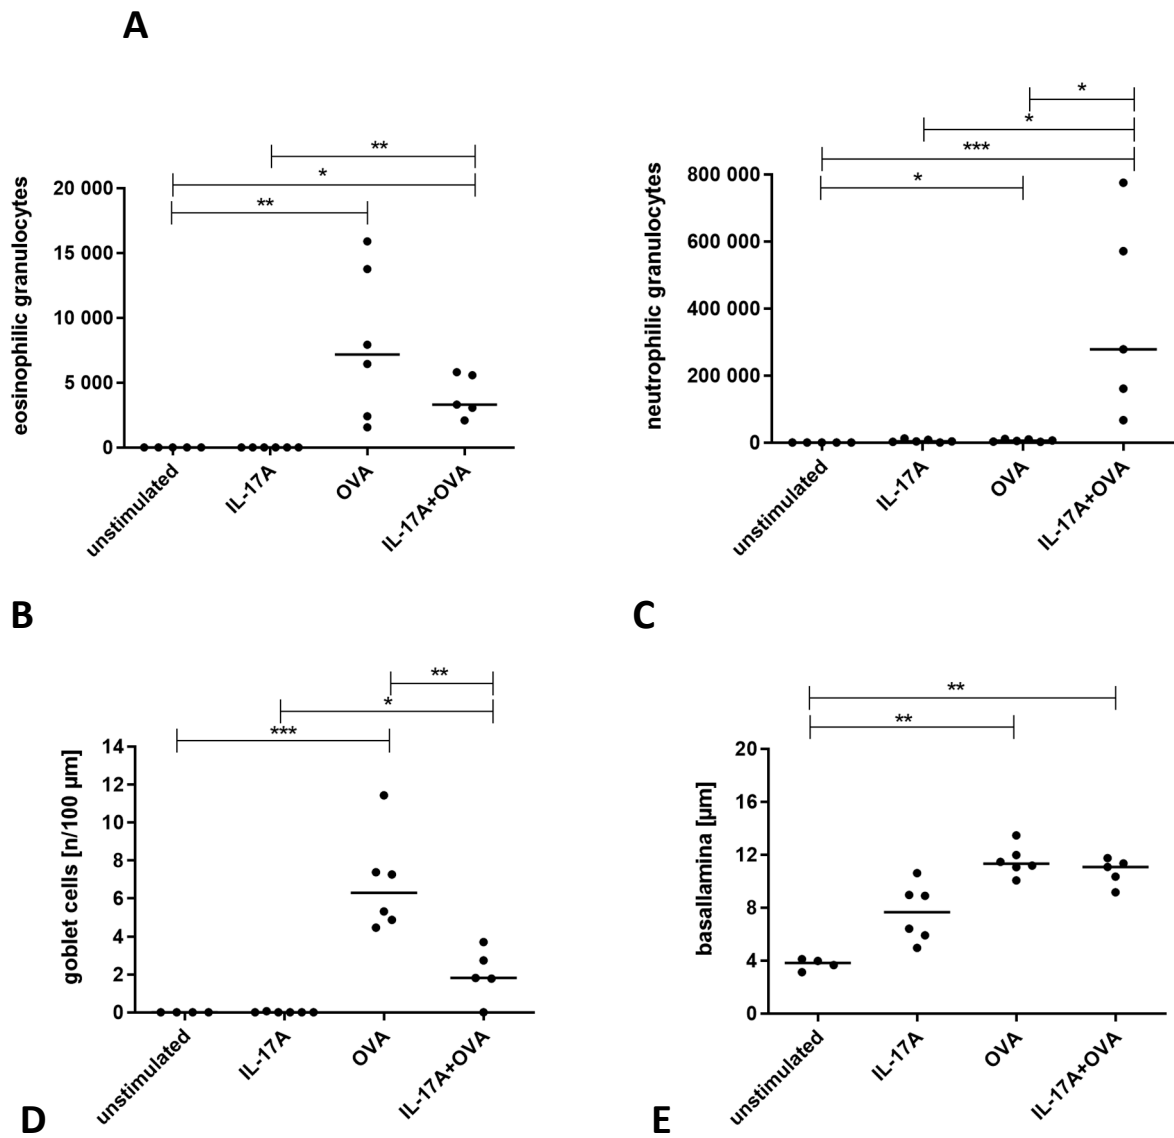

Supplemental Figure S5: **Allergic inflammation and remodeling in the airways of mice in a long-term challenge.** A: Treatment of Balb/c mice, Group1: unstimulated n=4, Group 2: IL-17A application intranasally (i.n.) n=6, Group 3: Ovalbumin (OVA)-asthma n=6, Group 4: OVA-Asthma + IL-17A i.n. n=6 B and C: cells in BAL cytopins, D : goblet cells in proximal airway epithelium, cells, per 100μm of Alician blue PAS stained lung sections, E: Thickness of the basal lamina in proximal airways measured after sirius-red staining, one datapoint reflects 25 measurements of 5 bronchioles from one mouse. Statistical differences were calculated using one-way ANOVA Kruskal-Wallis Test, for differences to control groups Dunn's post-test was used. \*p<0,05; \*\*p<0,01; \*\*\*p<0,001.
